# Supplementary material
Source: PubMed Central journal article supplement (PMC8050446)
Supplement: 2844_figures.pdf [file 2844_figures.pdf]

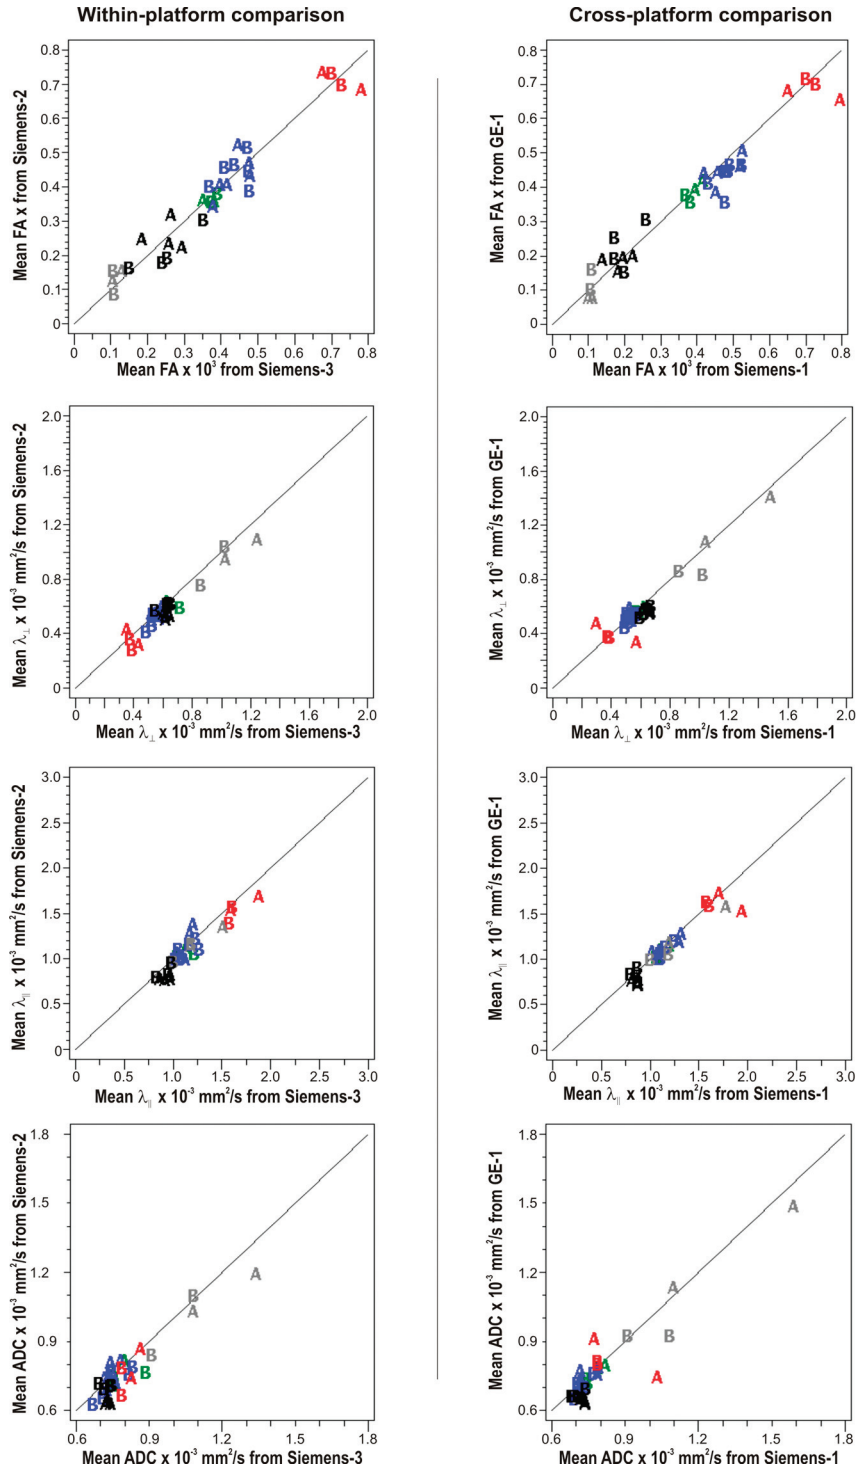

**On-line Fig 1.** A sample illustration of the concordance plots of DTI measures across different magnets and imaging platforms. Red indicates the corpus callosum; blue, deep white matter; green, subcortical white matter; gray, cortical gray matter; black, deep gray matter. A and B in the graphs represent the 2 healthy volunteers who were imaged in the study.

## Comparison across TIM-upgrade

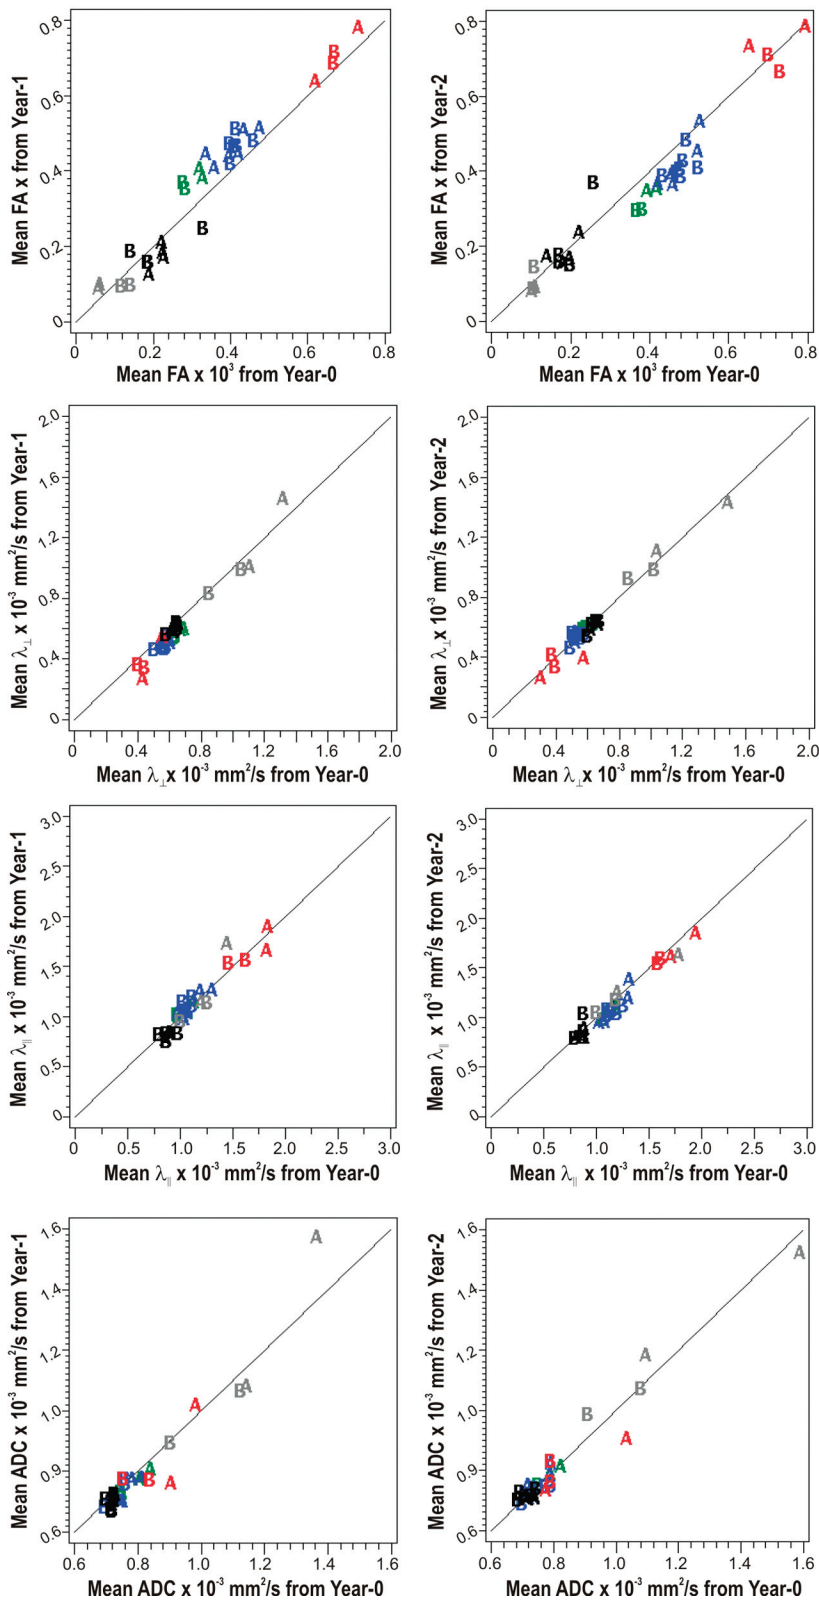

## Comparison after TIM-upgrade

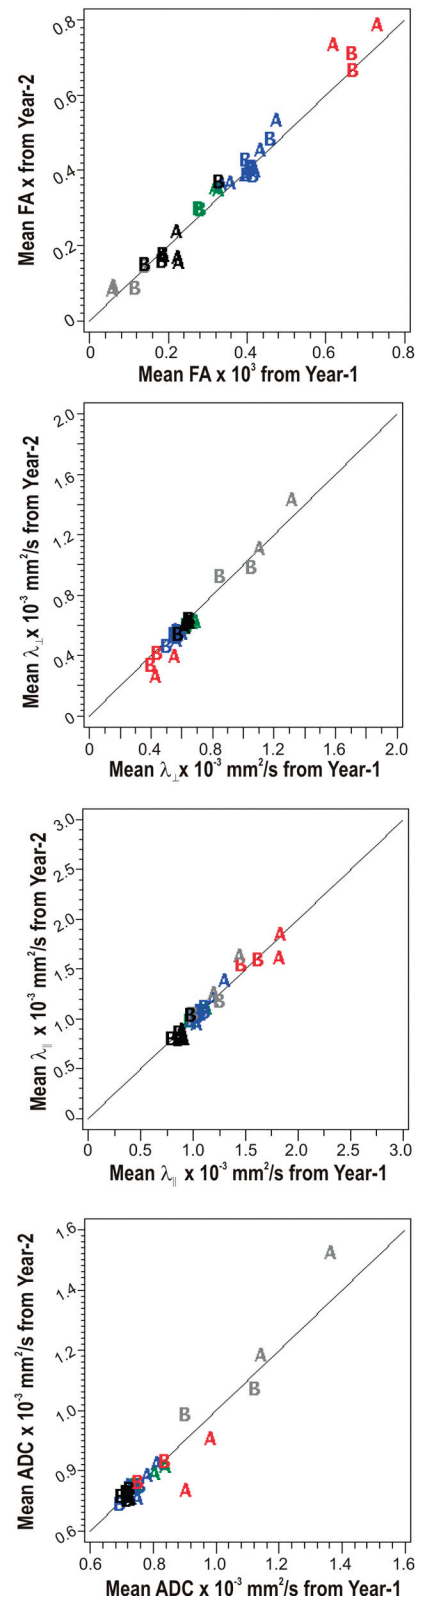

**On-line Fig 2.** Correlation of longitudinal DTI measures within the same magnet across a major system upgrade (Siemens TIM upgrade; year 0 versus years 1 and 2) and after the upgrade (year 1 versus year 2). Red indicates the corpus callosum; blue, deep white matter; green, subcortical white matter; gray, cortical gray matter; black, deep gray matter. A and B represent the 2 healthy volunteers who were imaged in the study.
